# Supplementary material
Source: publisher site journal article supplement (https://www.dovepress.com/article/275079)
Supplement: Supplementary file 1 [file get_supplementary_file.php]

# Supplementary Material

**eTable 1. Incidence Rate of Venous Thromboembolism Among Physically Active and Inactive Individuals**

|  | Person-years | Outcomes | IR per 1000 PY (95% CI) |
| --- | --- | --- | --- |
| **VTE overall** |  |  |  |
| Inactive | 209,812 | 340 | 1.62 (1.46–1.80) |
| Active | 168,251 | 168 | 1.00 (0.86–1.16) |
| **VTE provoked** |  |  |  |
| Inactive | 209,812 | 175 | 0.83 (0.72–0.97) |
| Active | 168,251 | 73 | 0.43 (0.34–0.55) |
| **VTE unprovoked** |  |  |  |
| Inactive | 209,812 | 165 | 0.79 (0.68–0.92) |
| Active | 168,251 | 95 | 0.56 (0.46–0.69) |

Abbreviations: CI, confidence interval; IR, incidence rate; PY, person-years; VTE, venous thromboembolism.
